# Supplementary material
Source: PubMed Central journal article supplement (PMC3169138)

# Supporting Information

Chen et al. 10.1073/pnas.1106420108

## SI Materials and Methods

**High-Level Expression of Human apoE3.** A monomeric, biologically active, full-length human apoE3 is generated using an engineered pET30(+) vector (Novagen) in which the long his-tag in the N terminus was replaced by a short his-tag (eight histidines) as described (1). The expressions were carried out using *Escherichia coli* BL21(DE3) cells. The purification procedures essentially followed the manuals. Using high cell density method (2), we can routinely produce 17–30 mg isotope-labeled apoE3 in 100-mL minimum medium.

**Preparation of Segmental Labeled apoE3 Proteins.** The preparation of segmental labeled apoE using on-column native chemical ligation was following the protocol described previously (3).

**NMR Spectroscopy Assignment.** All NMR samples contained ~1 mM uniform/segmental triple-labeled human apoE3, in a buffer containing 100 mM sodium phosphate, at pH 6.8, 0.01 mM Na<sub>3</sub>N<sub>3</sub>, 10 mM EDTA, 10 mM *d*<sub>10</sub>-DTT, 0.03 mM 4,4-dimethyl-4-silapentane-1-sulfonic acid (DSS), and 10% D<sub>2</sub>O. For 3D/4D Nuclear Overhauser Effect Spectroscopy (NOESY) spectral collection, we used 50% deuterated triple-labeled apoE3 in 100 mM sodium phosphate, 500 mM urea at pH 6.8, 0.01 mM Na<sub>3</sub>N<sub>3</sub>, 10 mM EDTA, 10 mM *d*<sub>10</sub>-DTT, 0.03 mM DSS, and 10% D<sub>2</sub>O. All spectra were acquired at 30 °C on 600 MHz Varian INOVA spectrometer equipped with a cryogenic probe. Backbone assignment of full-length human apoE3 was achieved as described (4). HCC-TOCSY-NNH, CCC-TOCSY-NNH, 15N-edited NOESY and 4D <sup>13</sup>C, <sup>15</sup>N-edited NOESY were collected using a 50% deuterated triple-labeled apoE3 for the side chain atom assignment. NMR data were processed on a SGI workstation using nmrPipe (5) and the assignment was achieved using the PIPP and nmrview software (6).

**NMR Structure Determination.** NOE distance restraints were generated using 3D/4D NOESY experiments, including 3D <sup>15</sup>N-edited NOESY and 4D-<sup>13</sup>C, <sup>15</sup>N-edited NOESY using both uniformly and segmentally labeled apoE3 samples. Unique segmental labeling strategy was developed using a <sup>2</sup>H, <sup>15</sup>N-apoE-NT-<sup>13</sup>C, <sup>15</sup>N-apoE-CT sample. The 3D <sup>15</sup>N-edited NOESY spectrum of this unique NMR sample allowed us to unambiguously identify 78 interdomain NOEs between apoE3-NT amide protons and apoE3-CT aliphatic protons (7). CSI program was used to predict secondary structure. TALOS program was used to obtain the backbone dihedral angles ( $\phi$  and  $\psi$  based on chemical shift information (8).

A total of 3,459 NOE derived distance restraints, 408 dihedral angle restraints, and 318 hydrogen bond restraints were used for performing the structure calculation using the software package CYANA (9). Structure calculations were carried out in an iterative manner and each iteration generated and energy minimized 200 NMR structures in CYANA, including 10,000 steps of simulated annealing. The generated structures were analyzed for distance and dihedral angle restraint violations. A new restraint set was generated after these analyses for the next calculation. Final twenty best-fit NMR structures were used for further analysis.

**Structural Analysis.** The NMR structures of apoE3 were analyzed using Insight II (*MSI, San Diego*) and VADAR (10) programs. The VADAR provides the detailed information of buried hydrophilic residues, buried H-bonds, including the fractional solvent-accessible surface area of the side chain of each residue as well as H-bonds present in each structure. Insight II was used for superimposition and manual generating the apoE opening models based on structural and functional data of apoE. The structures are displayed using Pymol (*DeLano Scientific, Palo Alto*).

1. Zhang Y, et al. (2007) A monomeric, biologically active, full-length human apolipoprotein E. *Biochemistry* 46:10722–10732.
2. Sivashanmugam A, et al. (2009) Practical protocols for production of very high yields of recombinant proteins using *Escherichia coli*. *Protein Sci* 18:936–948.
3. Zhao W, Zhang Y, Cui C, Li Q, Wang J (2008) An efficient on-column expressed protein ligation strategy: application to segmental triple labeling of human apolipoprotein E3. *Protein Sci* 17:736–747.
4. Zhang Y, Chen J, Wang J (2008) A complete backbone spectral assignment of lipid-free human apolipoprotein E (apoE). *Biomol NMR Assign* 2:207–210.
5. Delaglio F, et al. (1995) NMRPipe: a multidimensional spectral processing system based on UNIX pipes. *J Biomol NMR* 6:277–293.
6. Johnson BA, Blevins RA (1994) NMRView: a computer program for the visualization and analysis of NMR data. *J Biomol NMR* 4:603–614.
7. Chen J, Wang J (2011) A segmental labeling strategy for unambiguous determination of domain-domain interactions of large multidomain proteins. *J Biomol NMR* 50:403–410.
8. Cornilescu G, Delaglio F, Bax A (1999) Protein backbone angle restraints from searching a database for chemical shift and sequence homology. *J Biomol NMR* 13:289–302.
9. Guntert P (2004) Automated NMR structure calculation with CYANA. *Methods Mol Biol* 278:353–378.
10. Willard L, et al. (2003) VADAR: a web server for quantitative evaluation of protein structure quality. *Nucleic Acids Res* 31:3316–3319.







**Table S3. Buried hydrophilic residues within apoE3 \***

|                         | LoopN<br>(1–5) | HelixN1<br>(6–9) | HelixN2<br>(12–22) | Helix 1<br>(26–40) | Loop<br>(41–44) | Helix 1'<br>(45–52)                | Helix 2<br>(55–79)          | Loop<br>(80–88) | Helix 3<br>(89–125)                                                                    | Helix 4<br>(131–164)                                          |
|-------------------------|----------------|------------------|--------------------|--------------------|-----------------|------------------------------------|-----------------------------|-----------------|----------------------------------------------------------------------------------------|---------------------------------------------------------------|
| <b>ApoE-NT</b>          |                |                  |                    |                    |                 |                                    |                             |                 |                                                                                        |                                                               |
| LoopN                   |                |                  |                    |                    |                 |                                    |                             |                 |                                                                                        | R142, K146                                                    |
| Helix N1                |                |                  |                    |                    |                 |                                    |                             |                 |                                                                                        |                                                               |
| Helix N2                |                |                  |                    | E27                |                 |                                    |                             |                 |                                                                                        | D153, Q156, K157                                              |
| Helix 1                 |                |                  |                    |                    |                 |                                    | T67, E70                    |                 | Y118 †                                                                                 |                                                               |
| Helix 1'                |                |                  |                    |                    |                 |                                    |                             |                 |                                                                                        |                                                               |
| Helix 2                 |                |                  |                    | Y36                |                 |                                    |                             |                 |                                                                                        | Y162                                                          |
| Helix 3                 |                |                  |                    |                    |                 |                                    | Q55, T57, K75               |                 |                                                                                        |                                                               |
| Helix 4                 | E3, Q4         | T8               | Q17, T18<br>S22    |                    |                 |                                    |                             |                 | D107, R114<br>Y118                                                                     |                                                               |
| <b>The Hinge Domain</b> |                |                  |                    |                    |                 |                                    |                             |                 |                                                                                        |                                                               |
| HingeH1                 |                |                  |                    |                    |                 |                                    | E79                         |                 | R90, S94, Q98<br>Q101                                                                  | H140, D151                                                    |
| Hingeloop               |                |                  |                    |                    |                 |                                    |                             |                 |                                                                                        |                                                               |
| HingeH2                 |                |                  |                    |                    |                 |                                    | Q55, T57,<br>R61, D65, S197 |                 | C112, R119                                                                             |                                                               |
| <b>ApoE-CT</b>          |                |                  |                    |                    |                 |                                    |                             |                 |                                                                                        |                                                               |
| Helix C1                |                |                  |                    |                    | Q41, T42<br>S44 | Q46, E49<br>E50, S53,<br>S54, R213 |                             |                 |                                                                                        | R134,                                                         |
| Helix C2                | R142, R146     |                  |                    |                    |                 |                                    | R217                        | T83             | T89, R92,<br>E96, Q98,<br>R103, D107<br>D110, E245<br>S263, E266<br>E238, K242<br>Q235 | K143, R147<br>R150, D154<br>Q246<br>Q249, R264<br>D227, E234, |
| Loop                    | T225           |                  |                    |                    |                 |                                    |                             |                 |                                                                                        |                                                               |
| Helix C3                |                |                  | Q275               |                    |                 |                                    |                             |                 |                                                                                        | D154, K157<br>R158, D271                                      |
| LoopC                   | E281           |                  |                    |                    |                 |                                    |                             |                 |                                                                                        | S139<br>R150<br>Q279, E281<br>E287                            |

\*This table lists all the buried hydrophilic residues among apoE3 within the apoE-NT and between apoE domains. Based on orientations of these buried hydrophilic residues, we show them between the two helices. For example, S197 is between helices 2 and HingeH2

†The bold buried hydrophilic residues are between the two lobes of the allowed helix bundle opening of the apoE-NT (see Table S6, 11). The blue buried hydrophilic residues are between LoopN, Helices N1, N2, and Helix 4 that maintain the Loop N, Helices N1 and N2 in the defined position to interaction with Helix 4

**Table S4. Hydrophobic residue distribution of the apoE-CT**

**Buried hydrophobic residues of the apoE-CT between apoE domains.**

M221, T225, L229, A237, V239, L243, L252, A256, A259, V280, A291, V294.

**ApoE-CT exposed hydrophobic residues**

W210, L214, A216, M218, V232, V236, A241, A247, I250, A254, A257, L261, F265, L268, A269, M272, W276, A277, V283, A285, A286, T289, A292, P295, H299.

**Table S5. H-bonds and salt-bridges within apoE N-terminal domain**

|                   | LoopN<br>(1-5)     | HelixN1<br>(6-9)                              | HelixN2<br>(12-22) | Helix 1<br>(26-40) | Loop<br>(41-44)                    | Helix 1'<br>(45-52) | Helix 2<br>(55-79)             | Loop<br>(80-88) | Helix 3<br>(89-125)                                                                     | Helix 4<br>(131-164) |
|-------------------|--------------------|-----------------------------------------------|--------------------|--------------------|------------------------------------|---------------------|--------------------------------|-----------------|-----------------------------------------------------------------------------------------|----------------------|
| Helix 1           |                    |                                               |                    |                    |                                    |                     | W26-E70<br>L30b-T67<br>Y36-E59 |                 |                                                                                         |                      |
| Helix 1'          |                    |                                               |                    |                    |                                    | E50-Q55             |                                |                 |                                                                                         |                      |
| Helix 2           |                    |                                               |                    |                    |                                    |                     |                                |                 |                                                                                         |                      |
| Helix 3           |                    |                                               |                    |                    |                                    | R119-L52b           |                                |                 |                                                                                         |                      |
| Loop<br>(126-130) |                    |                                               |                    |                    | T130-L43b<br>T130-S44b<br>R145-Q41 |                     |                                |                 |                                                                                         |                      |
| Helix 4           | R142-E3<br>K146-Q4 | D153-L14b<br>Q156-Q21<br>Q156-S22<br>K157-Q17 |                    |                    |                                    |                     |                                |                 | L148b-D107<br>D151-A100b<br>D151-L104b<br>R158-E96<br>R172-S94<br>A176b-S94<br>E179-Q98 |                      |
| HingeH1           |                    |                                               |                    |                    |                                    |                     |                                |                 |                                                                                         |                      |

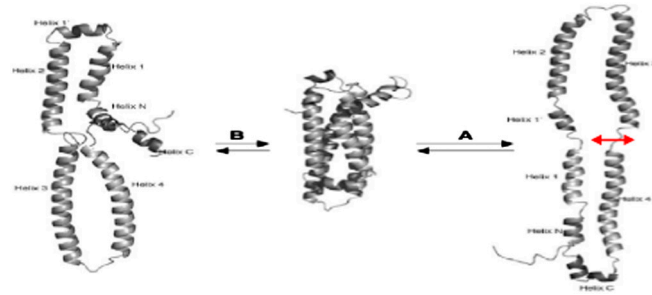

Supplement: 1106420108_pnas.1106420108_SI.pdf [file 1106420108_pnas.1106420108_SI.pdf]
